# Supplementary material for: Arabidopsis TGA256 Transcription Factors Suppress Salicylic-Acid-Induced Sucrose Starvation
Source: MDPI journal article supplement (doi:10.3390/plants12183284), 2023-09-16
Supplement: s1 [file s1]

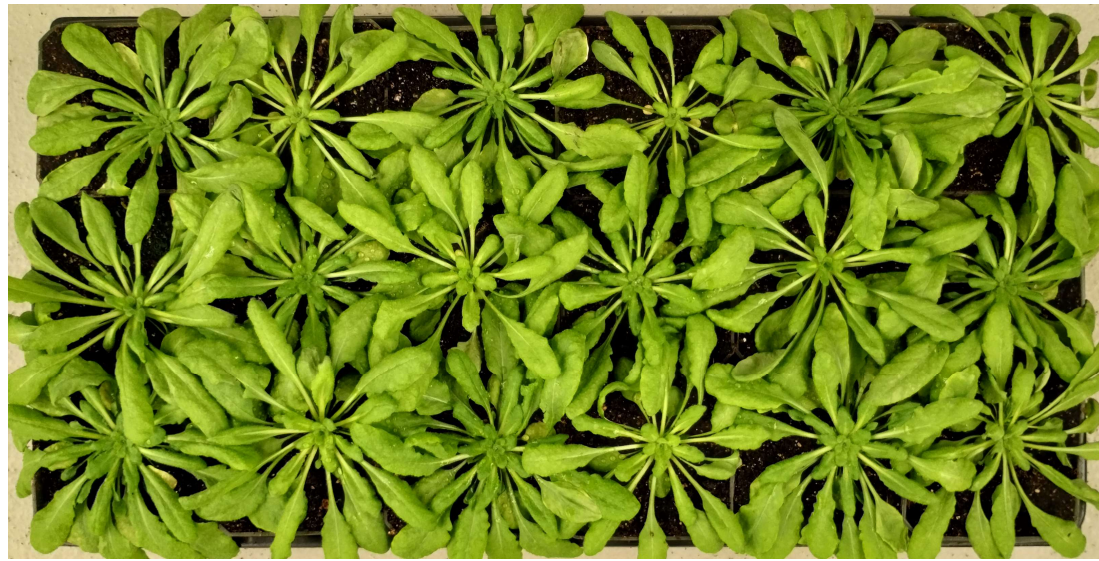

**Supporting figure S2.** Cultivation of wild-type and *tga256* mutant plants for phenotypic comparison. Wild-type and mutant plants were grown in an alternating pattern with equal watering, fertilizer and irradiance to minimize environmental effects. Plants were flash frozen in liquid nitrogen to harvest for metabolite analysis. Plant IDs (left to right, rows numbered from top to bottom) are as follows: Row 1: WT-1, *tga256*-1, WT-2, *tga256*-2, WT-3, *tga256*-3; Row 2: *tga256*-4, WT-4, *tga256*-5, WT-5, *tga256*-6, WT-6; Row 3: WT-7, *tga256*-7, WT-8, *tga256*-8, WT-9, *tga256*-9.

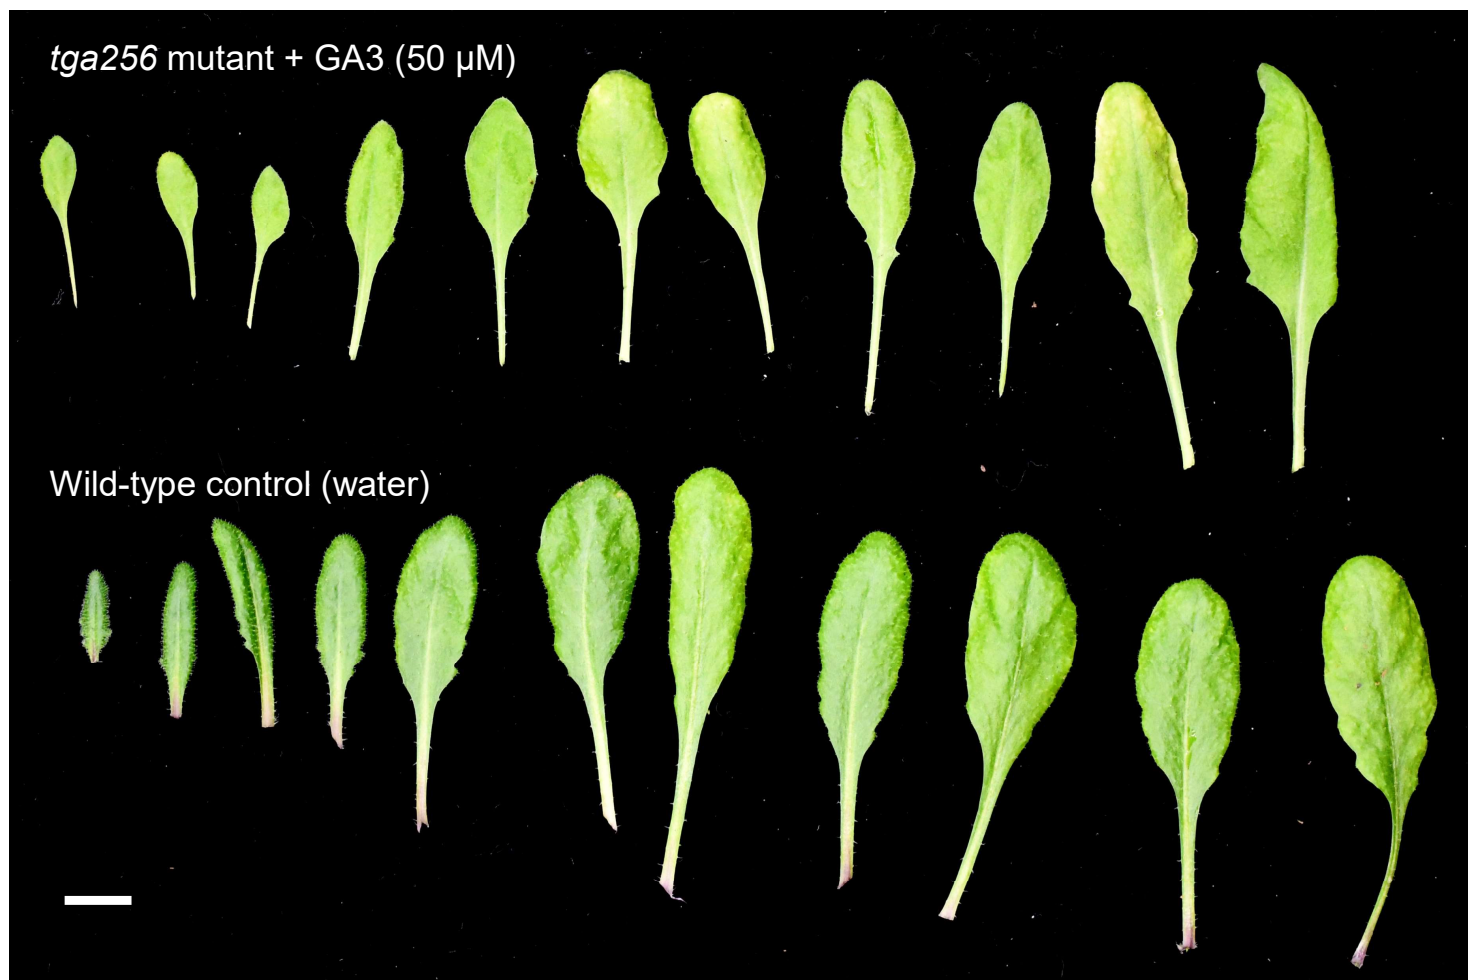

**Supporting figure S3.** Leaf series following gibberellin application to *tga256* mutant plants. Gibberellin levels in mutant plants were only ~33% of wild-type levels, and mutants were sprayed with exogenous 50  $\mu$ M GA3 3 times a week for 3 weeks to determine whether gibberellin supplementation could restore wild-type leaf morphology. Following 3 weeks of GA3 treatment, there was no observable complementation of mutant leaf or petiole phenotype.

**Supporting Table S1. HPLC gradients for separation of phosphorylated metabolites and phytohormones.**

| <b>Gradient</b>         | <b>Time (min)</b> | <b>Solvent A (%)</b>                           | <b>Solvent B (%)</b> |
|-------------------------|-------------------|------------------------------------------------|----------------------|
| Gradient A <sup>a</sup> | 0.5 mL/min        | 20 mM NH <sub>4</sub> HCO <sub>3</sub> pH 10.5 | 80% acetonitrile     |
|                         | 0                 | 0                                              | 100                  |
|                         | 5                 | 16                                             | 84                   |
|                         | 10                | 16                                             | 84                   |
|                         | 11                | 40                                             | 60                   |
|                         | 15                | 40                                             | 60                   |
|                         | 15.1              | 0                                              | 100                  |
|                         | 30                | 0                                              | 100                  |
| Gradient B <sup>b</sup> | 1.1 mL/min        | 0.1% formic acid                               | Acetonitrile         |
|                         | 0                 | 95                                             | 5                    |
|                         | 0.5               | 95                                             | 5                    |
|                         | 9.5               | 42                                             | 58                   |
|                         | 9.51              | 0                                              | 100                  |
|                         | 11                | 0                                              | 100                  |
|                         | 11.01             | 95                                             | 5                    |
|                         | 14                | 95                                             | 5                    |

<sup>a</sup> Gradient A was performed on an XBridge BEH amide hydrophilic interaction chromatography column (2.1 × 150 mm, 2.5 μm particle size; Waters Corporation)

<sup>b</sup> Gradient B was performed on a Zorbax Eclipse XDB-C18 RRHT chromatography column (4.6 × 50 mm, 1.8 μm particle size; Agilent Technologies)

**Supporting Table S2.** MS/MS parameters for analysis of phosphorylated metabolites and phytohormones.

| ID              | Gradient | Mode | Q1<br>(m/z) | Q3<br>(m/z) | Dwell<br>time (s) | DP  | EP  | CE  | CXP | CUR | CAD | IS    | TEM | GSI | GS2 |
|-----------------|----------|------|-------------|-------------|-------------------|-----|-----|-----|-----|-----|-----|-------|-----|-----|-----|
| MEcDP           | A        | (-)  | 277         | 79          | 50                | -30 | -10 | -65 | -11 | 20  | 10  | -4000 | 500 | 60  | 30  |
| IDP/DMADP       | A        | (-)  | 245         | 79          | 50                | -45 | -6  | -24 | -6  | 20  | 10  | -4000 | 500 | 60  | 30  |
| DXP             | A        | (-)  | 213         | 79          | 50                | -30 | -10 | -40 | -8  | 20  | 10  | -4000 | 500 | 60  | 30  |
| 2-DGP           | A        | (-)  | 243         | 79          | 50                | -35 | -10 | -62 | -7  | 20  | 10  | -4000 | 500 | 60  | 30  |
| PEP             | A        | (-)  | 167         | 79          | 50                | -5  | -10 | -14 | -5  | 20  | 10  | -4500 | 700 | 60  | 30  |
| GAP             | A        | (-)  | 169         | 97          | 50                | -35 | -10 | -20 | -20 | 20  | 10  | -4500 | 700 | 60  | 30  |
| 2-DGP           | A        | (-)  | 243         | 79          | 50                | -35 | -10 | -62 | -7  | 20  | 10  | -4500 | 700 | 60  | 30  |
| DHAP            | A        | (-)  | 169         | 97          | 50                | -23 | -10 | -15 | -7  | 20  | 10  | -4500 | 700 | 60  | 30  |
| Xu5P            | A        | (-)  | 229         | 97          | 50                | -5  | -10 | -18 | -6  | 20  | 10  | -4500 | 700 | 60  | 30  |
| G6P/F6P         | A        | (-)  | 259         | 97          | 50                | -17 | -8  | -19 | -9  | 20  | 10  | -4500 | 700 | 60  | 30  |
| S7P             | A        | (-)  | 289         | 97          | 50                | -38 | -5  | -22 | -7  | 20  | 10  | -4500 | 700 | 60  | 30  |
| IAA             | B        | (-)  | 174         | 130         | 10                | -25 | -9  | -14 | -2  | 25  | 7   | -4500 | 650 | 60  | 60  |
| SA              | B        | (-)  | 137         | 93          | 10                | -20 | -8  | -24 | 0   | 25  | 7   | -4500 | 650 | 60  | 60  |
| SAG             | B        | (-)  | 299         | 137         | 10                | -20 | -10 | -18 | -2  | 25  | 7   | -4500 | 650 | 60  | 60  |
| ABA             | B        | (-)  | 263         | 153         | 10                | -35 | -12 | -22 | -2  | 25  | 7   | -4500 | 650 | 60  | 60  |
| Tropate         | B        | (-)  | 165         | 103         | 5                 | -40 | -9  | -14 | -6  | 25  | 7   | -4500 | 650 | 60  | 60  |
| IAA             | B        | (+)  | 176         | 130         | 50                | 40  | 10  | 20  | 10  | 25  | 10  | 4500  | 650 | 60  | 60  |
| GA <sub>3</sub> | B        | (-)  | 345         | 239         | 10                | -79 | -10 | -32 | -10 | 25  | 7   | -4500 | 650 | 60  | 60  |

DP, declustering potential; EP, entrance potential; CE, collision energy; CXP, cell exit potential; Q1, quadrupole 1 mass; Q3, quadrupole 3 mass; CUR, curtain gas; CAD, collision gas; IS, ion spray voltage; GSI, ion source gas 1; GS2, ion source gas 2; MEcDP, 2C-methyl-D-erythritol 2,4-cyclodiphosphate; IDP, isopentenyl diphosphate; DMADP, dimethylallyl diphosphate; DXP, 1-deoxy-D-xylulose 5-phosphate; 2-DGP, 2-deoxy-D-glucose 6-phosphate; PEP, 2-phosphoenolpyruvate; GAP, D-glyceraldehyde 3-phosphate; G3P, DHAP, dihydroxyacetone phosphate; Xu5P, xylulose 5-phosphate; S7P, sedoheptulose 7-phosphate; IAA, indole-3-acetic acid; SA, salicylic acid; SAG, salicylic acid-2-O-β-D-glycoside; ABA, abscisic acid; GA<sub>3</sub>, gibberellic acid.

**Supporting Table S3.** Primer sequences for quantitative PCR assays.

| Primer name | Sequence (5'→3')            |
|-------------|-----------------------------|
| TGA2-F      | GAGACAGTTGATGGGCATAAATAACC  |
| TGA2-R      | TTAGAGCTCGTAGCCGTGAGAAG     |
| TGA5-F      | ACAACAATCGCTAGACATAAATAACT  |
| TGA5-R      | TAAGAGCACGTAACCGCAATGTA     |
| TGA6-F      | ACGACAGGTAATGGGCATCAATAGCT  |
| TGA6-R      | TAAGAGCACGTAATCGAGATGAA     |
| NPR1-F      | TTGCCGGAAGAGCTTGTTAAAG      |
| NPR1-R      | GAGTCAAGTGCCTTATGTACATTCTGA |
| NPR3-F      | AGTTCCTCCCGAAGTAGCAGAGA     |
| NPR3-R      | TGAGAATTTTACCGATTCTTTCAAGC  |
| NPR4-F      | GGAGCTTCCTTTAGAAGTATTGGAAAA |
| NPR4-R      | TGAGTACTTTCCTGTTCTCTCTATC   |
| PR1-F       | GCAGCCTATGCTCGGAGCTA        |
| PR1-R       | AGACGCCAGACAAGTCACCG        |
| RP2lsF      | GAAGGCAAAGGAAGGCAGAATCAG    |
| RP2lsR      | GCAATACTCCACGGAACACCAAG     |
| APT1F       | GTTGCAGGTGTTGAAGCTAGAGGT    |
| APT1R       | TGGCACCAATAGCCAACGCAATAG    |
